# Supplementary material for: A Ni-doped Mo2C/NCF composite for efficient electrocatalytic hydrogen evolution
Source: Royal Society of Chemistry journal article supplement (doi:10.1039/d3cc01810e), 2023-01-01
Supplement: d3cc01810e1.pdf [file d3cc01810e1.pdf]

## Supporting information

### Ni doped Mo<sub>2</sub>C/NCF composite for efficient electrocatalytic hydrogen evolution

Jie Yang<sup>1</sup>, Tariq Bashir<sup>1</sup>, Yanping Lin<sup>2</sup>, Lijun Gao<sup>1\*</sup>

1. College of Energy, Soochow Institute for Energy and Materials Innovations, Soochow University, Suzhou 215006, China
2. School of Physics and Energy, Xuzhou University of Technology, Xuzhou 221018, China

\* Corresponding author: [gaolijun@suda.edu.cn](mailto:gaolijun@suda.edu.cn) (L. Gao)

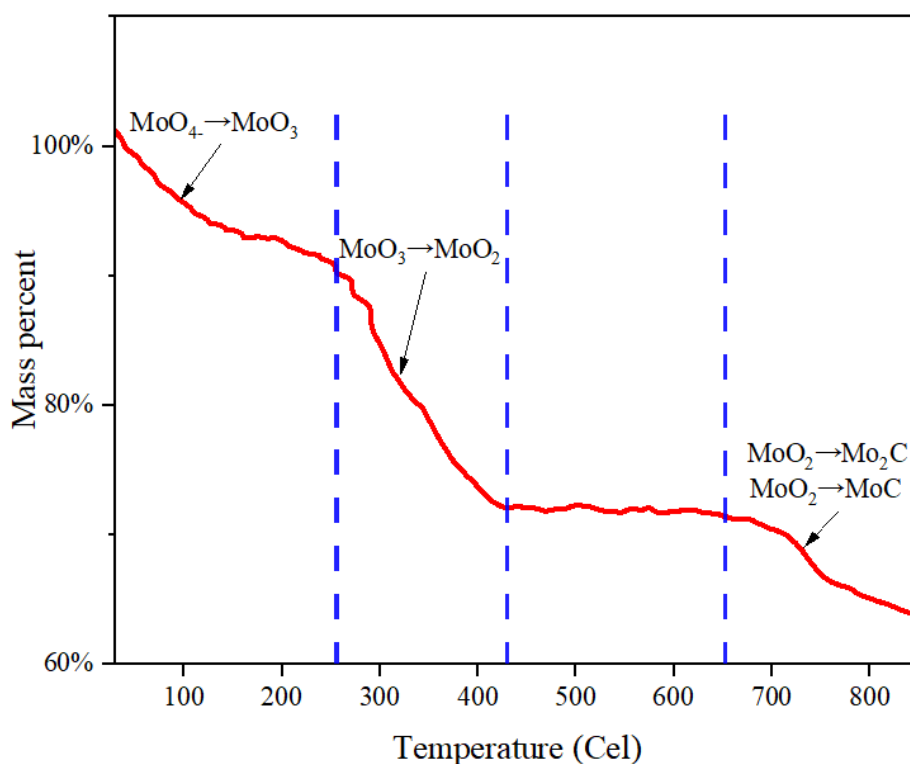

**Fig. S1** Thermo-gravimetric profile of dopamine-chelating ammonium molybdate.

a

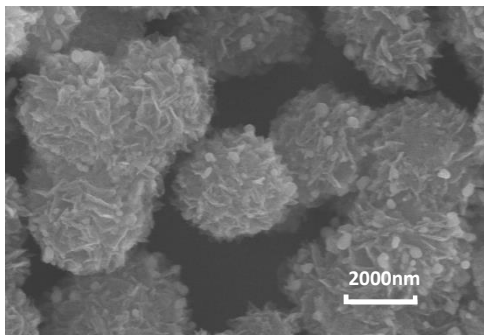

b

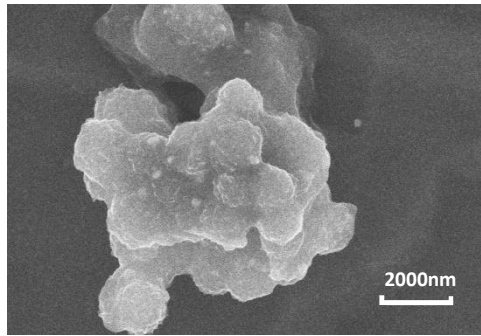

**Fig. S2** SEM images of the molybdenum carbide material at (a) 700 °C and (b) 800 °C

a

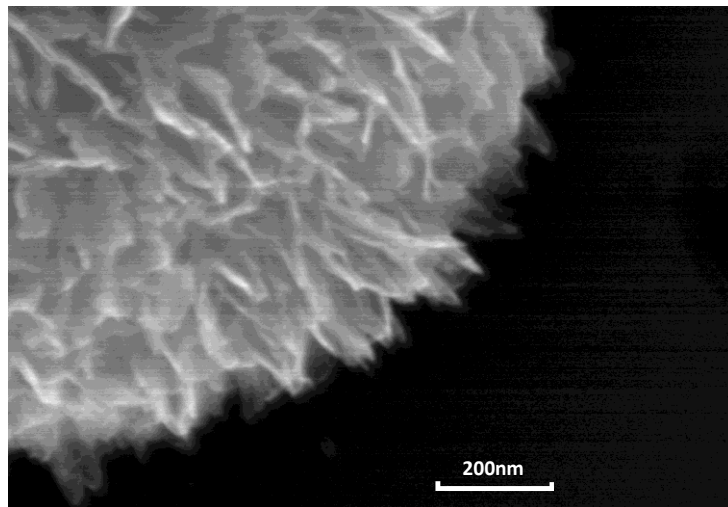

b

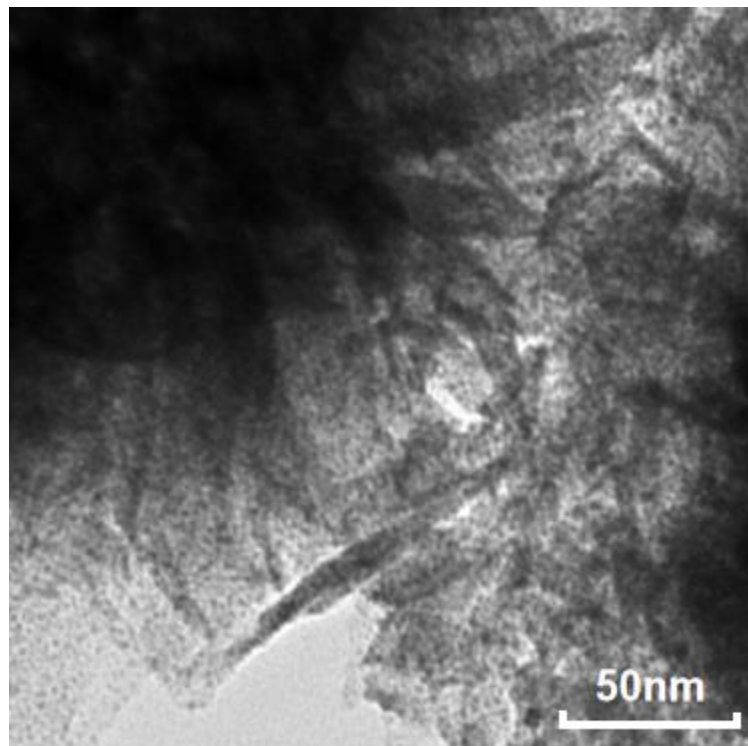

c

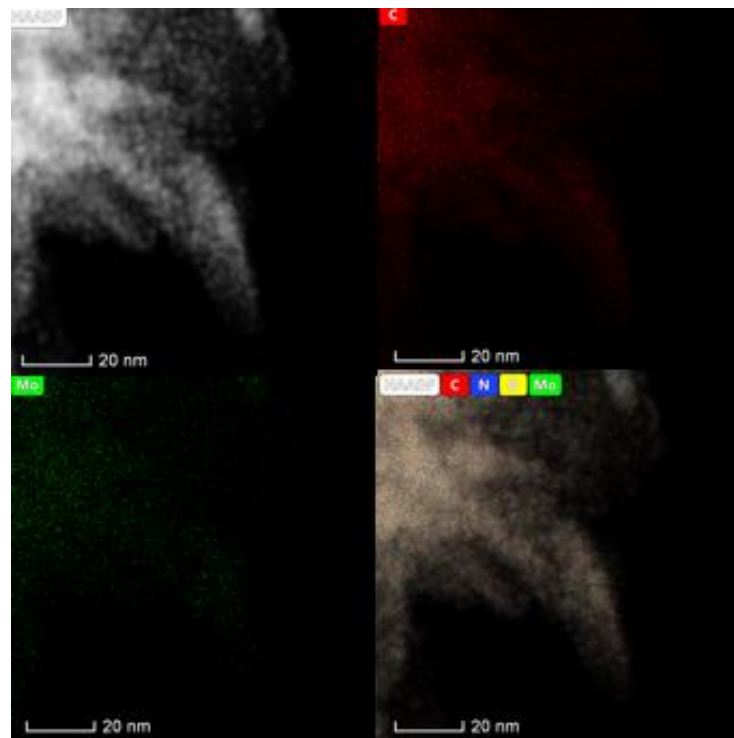

d

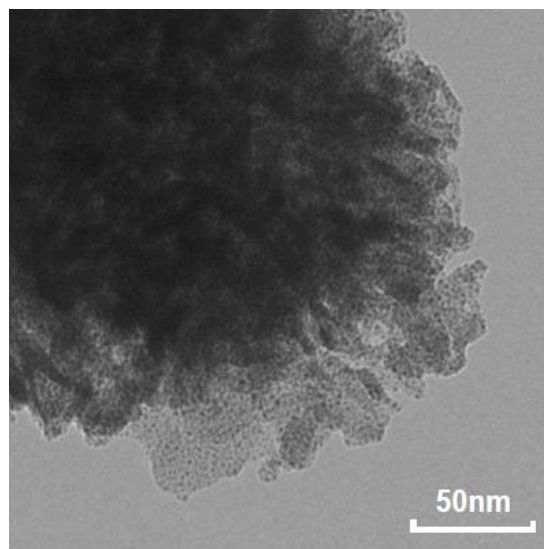

**Fig. S3.** Structural characterizations of molybdenum carbide, (a) SEM image of NCF, (b) TEM image, and (c) EDS elemental mapping of Mo<sub>2</sub>C/NCF. (d) TEM image of Ni-Mo<sub>2</sub>C/NCF.

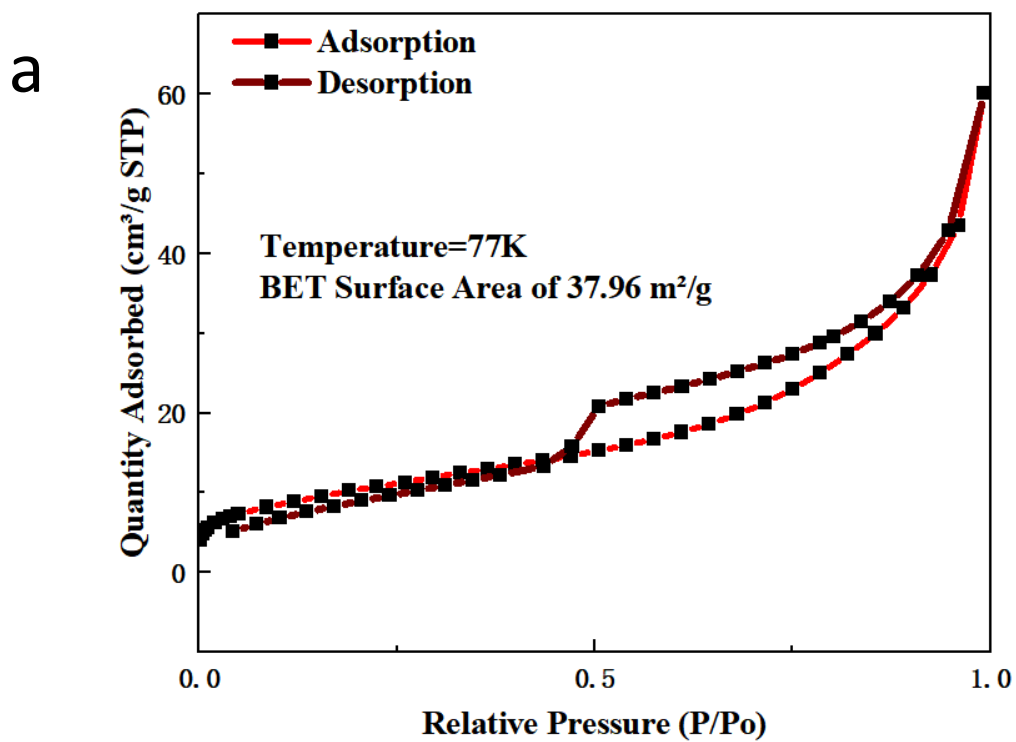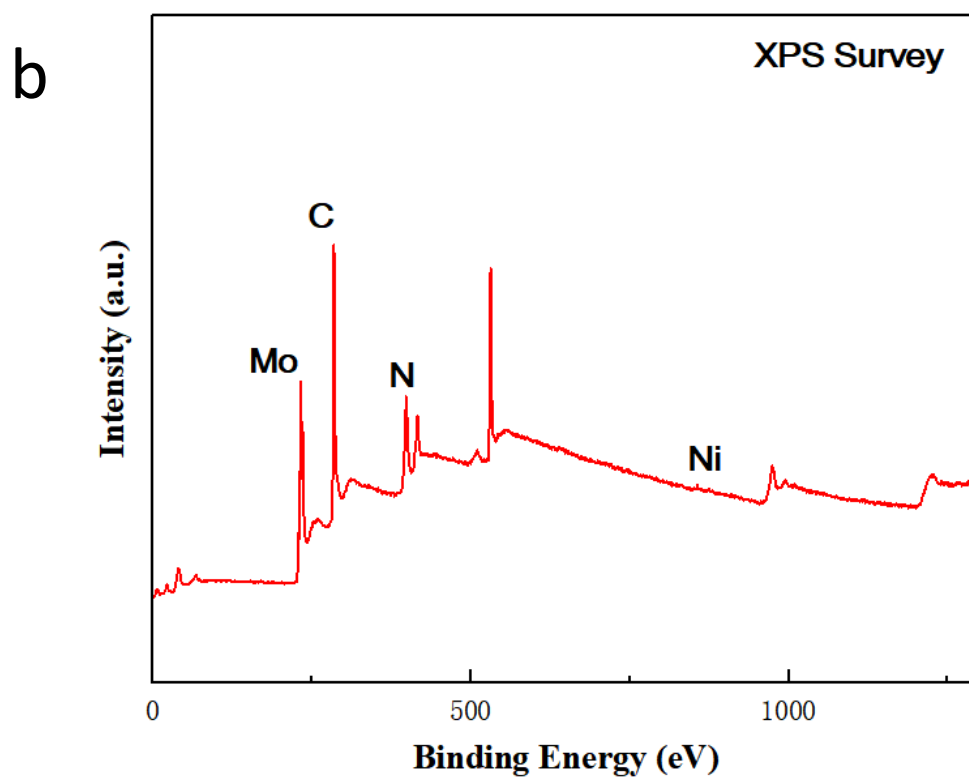

**Fig. S4.** (a) Nitrogen adsorption-desorption isotherm of Ni-Mo<sub>2</sub>C/NCF at 77 K, (b) XPS survey spectrum of Mo<sub>2</sub>C/NCF showing the presence of Mo, N, C and Ni elements.

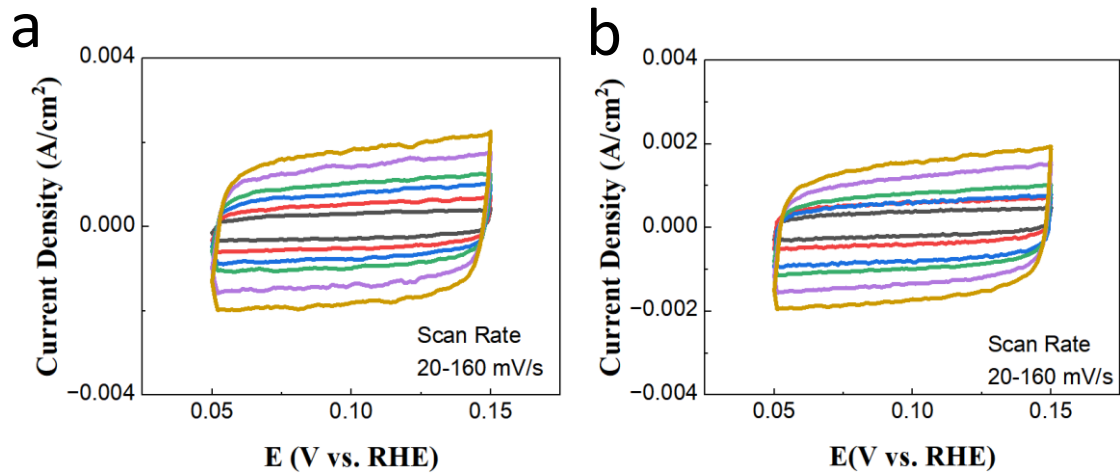

**Fig. S5.** CV curves of (a) Ni-Mo<sub>2</sub>C/NCF and (b) Mo<sub>2</sub>C/NCF under different scan rates from 20 to 160 mV/s in 1.0 M KOH.

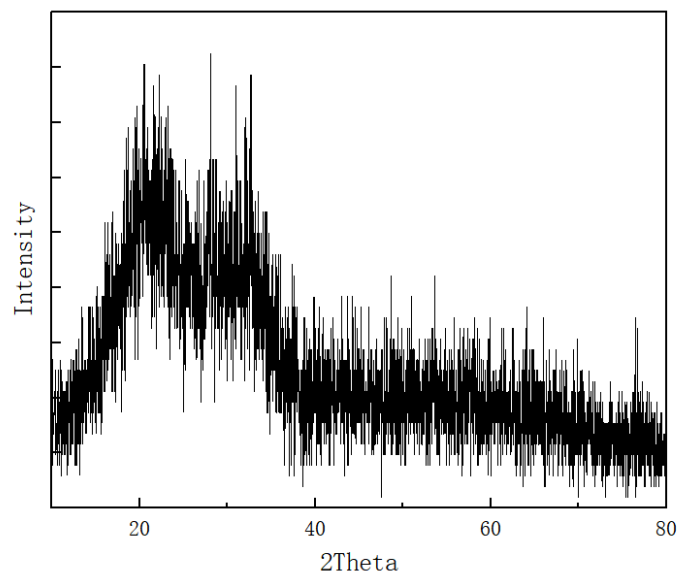

**Fig. S6.** XRD of Mo-chelated polydopamine .

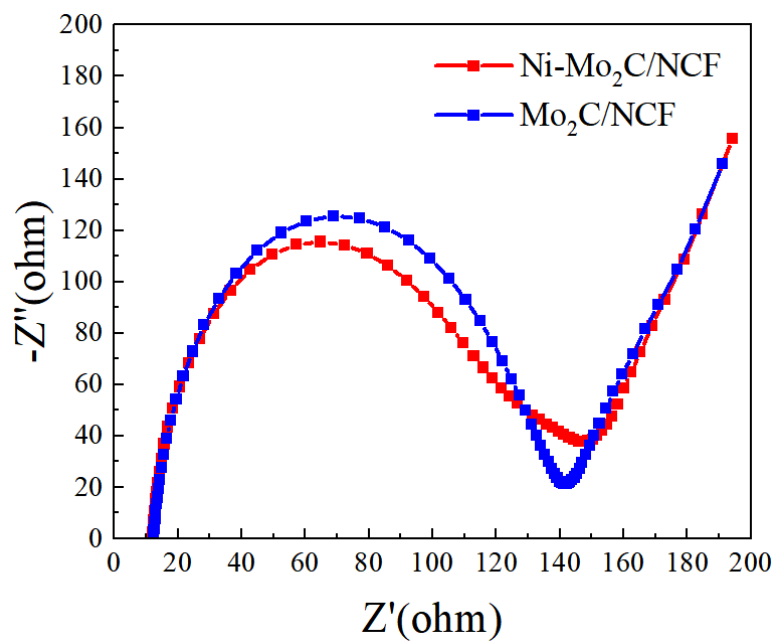

**Fig. S7.** Nyquist plots of Ni-Mo<sub>2</sub>C/NCF and Mo<sub>2</sub>C/NCF in 1.0M KOH at open circuit potential.

## Conversion method of $E_{RHE}$

Based on the Nernst equation we can derive:

$$E_{RHE} = E_{test} + 0.059 \times \text{pH} + E_R,$$

where  $E_{test}$  is the original voltage applied during the test,  $E_R$  is the standard electrode potential of the reference electrode, the value of pH is about 13.6 in 1M KOH solution. In this work, the reference electrode was Hg/HgO,  $E_R=0.098\text{V}$

$$\begin{aligned} E_{RHE} &= E_{test} + 0.059 \times 13.6 + 0.098 \\ &= E_{test} + 0.9004 \end{aligned}$$

## Calculation of ECSA

Based on the linear fitting of **Fig. 3d** insert, we can derive specific capacitance of Ni-Mo<sub>2</sub>C/NCF as follows:

$$C = \frac{k}{2m} = \frac{21.6\text{mF/cm}^2}{2 \times 0.28\text{mg/cm}^2} = 38.6 \text{ F/g},$$

where  $C$  is the specific capacitance of Ni-Mo<sub>2</sub>C/NCF,  $k$  is the fitting slope,  $m$  is the catalyst areal loading.

Then, we can calculate its ECSA of Ni-Mo<sub>2</sub>C/NCF by assuming a standard value of  $30 \mu\text{F/cm}^2$  (it is commonly used for many oxide surfaces) :

$$ECSA = \frac{C}{30 \mu\text{F/cm}^2} = 128.6 \text{ m}^2/\text{g}$$
